# Supplementary material for: Genetic Correlation between Body Fat Percentage and Cardiorespiratory Fitness Suggests Common Genetic Etiology
Source: PLoS One. 2016 Nov 15;11(11):e0166738. doi: 10.1371/journal.pone.0166738 (PMC5112859; doi:10.1371/journal.pone.0166738)
Supplement: S4 Table — Data are given in means ± standard error (SE) and median (interquartile ranges). Associations between FTO-rs1558902 and CRF were examined by linear regression using additive genetic models. VO2maxFM was log-transformed. Models were adjusted for age and sex or age, sex and body composition. (XLSX) [file pone.0166738.s004.xlsx]

## Sheet: Sheet1
S4 Table. Associations between the FTO rs1558902 and VO2max (ml/kg/min), VO2maxFFM (ml/kg FFM/min) as well as VO2maxFM (ml/kg FM/min) in ADDITION-PRO and Health2006, assuming a fixed effect model.
Trait	Covariates	Cohort	Effect	SE (range)	P
VO2max (ml/kg/min)	age, sex	ADDITION-PRO	-0.64	0.26	0.01
		Health 2006	-0.27	0.21	0.21
VO2max (ml/kg/min)	age, sex, BMI	ADDITION-PRO	-0.44	0.24	0.07
		Health2006	0.08	0.19	0.66
VO2max (ml/kg/min)	age, sex, fat-free mass	ADDITION-PRO	-0.62	0.26	0.02
		Health2006	0.02	0.2	0.91
VO2maxFFM (ml/kg FFM/min)	age, sex	ADDITION-PRO	-0.39	0.36	0.29
		Health2006	0.02	0.26	0.94
VO2maxFFM (ml/kg FFM/min)	age, sex, BMI	ADDITION-PRO	-0.59	0.35	0.09
		Health2006	0.2	0.25	0.43
VO2maxFFM (ml/kg FFM/min)	age, sex, fat mass	ADDITION-PRO	-0.59	0.35	0.09
		Health2006	0.21	0.26	0.42
VO2maxFM (ml/kg FM/min)	age, sex	ADDITION-PRO	-0.04	0.02	0.006
		Health2006	-0.03	0.01	0.02
VO2maxFM (ml/kg FM/min)	age, sex, BMI	ADDITION-PRO	-0.02	0.01	0.17
		Health2006	0.0004	0.007	0.61
VO2maxFM (ml/kg FM/min)	age, sex, fat-free mass	ADDITION-PRO	-0.04	0.02	0.008
		Health2006	-0.003	0.01	0.73
Data are given in means ± standard error (SE) and median (interquartile ranges). Associations between FTO-rs1558902 and CRF were examined by linear regression using additive genetic models. VO2maxFM was log-transformed. Models were adjusted for age and sex or age, sex and body composition.
